# Supplementary material
Source: MDPI journal article supplement (https://www.mdpi.com/2076-3417/12/5/2483)
Supplement: s1 [file s1]

## Supplementary Figure S1

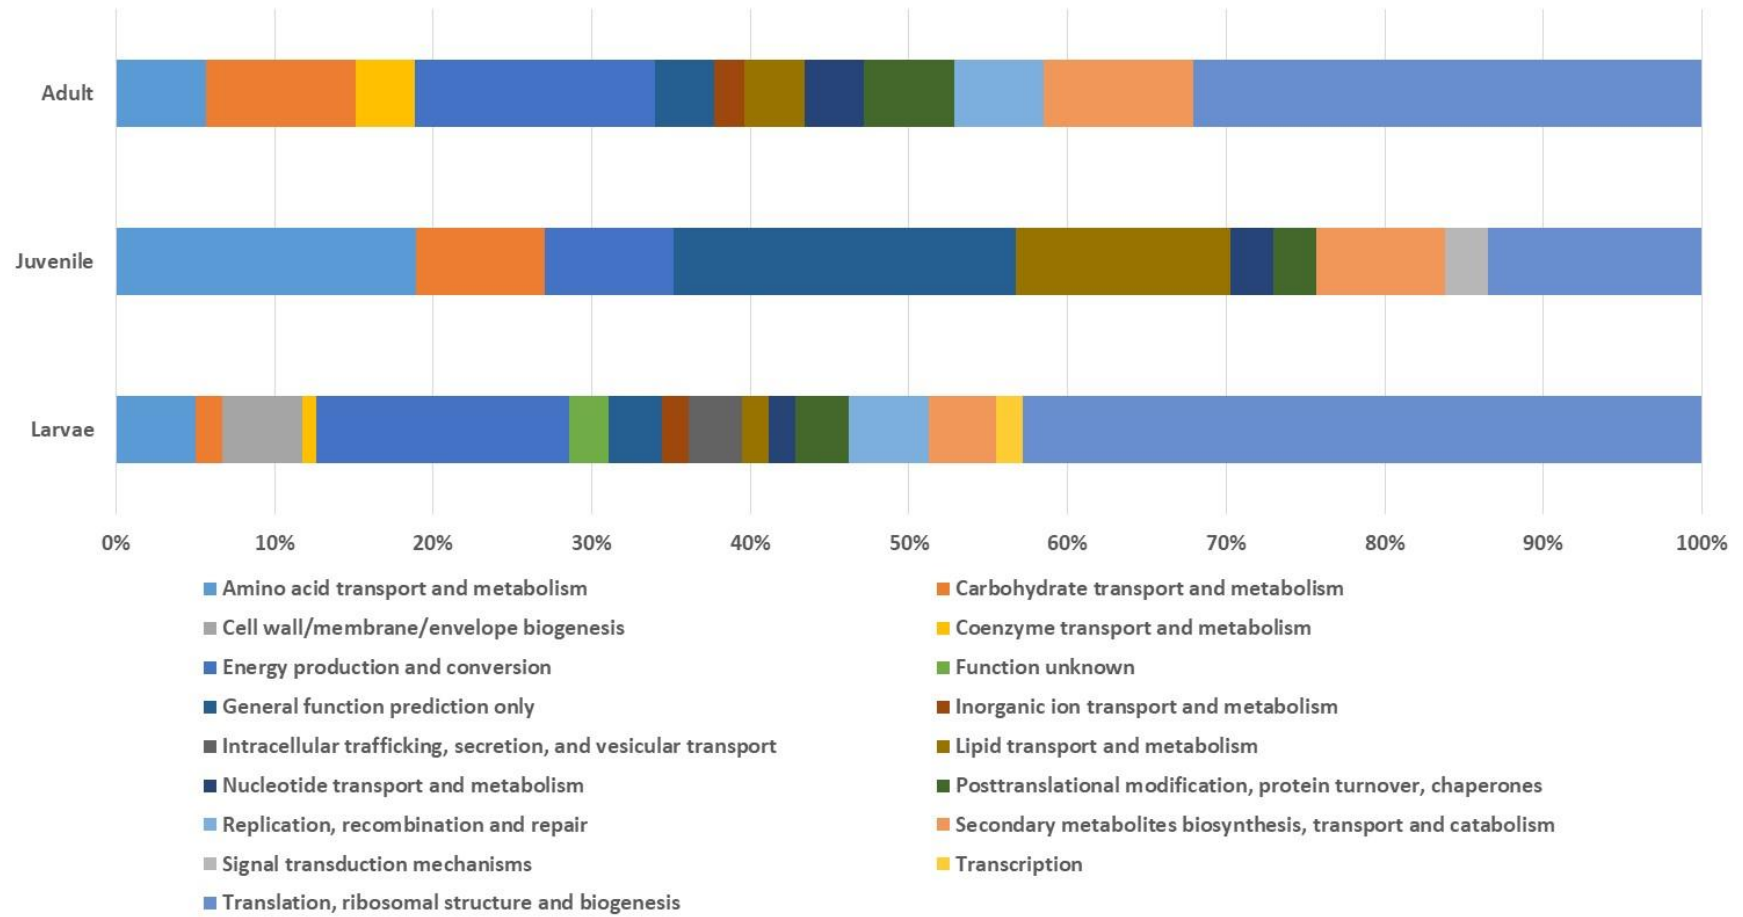

**Figure S1.** Functional classification based on level 2 of clustered orthologous groups in the microbiome of *L. vannamei* during different stages of development.

## Supplementary Figure S2

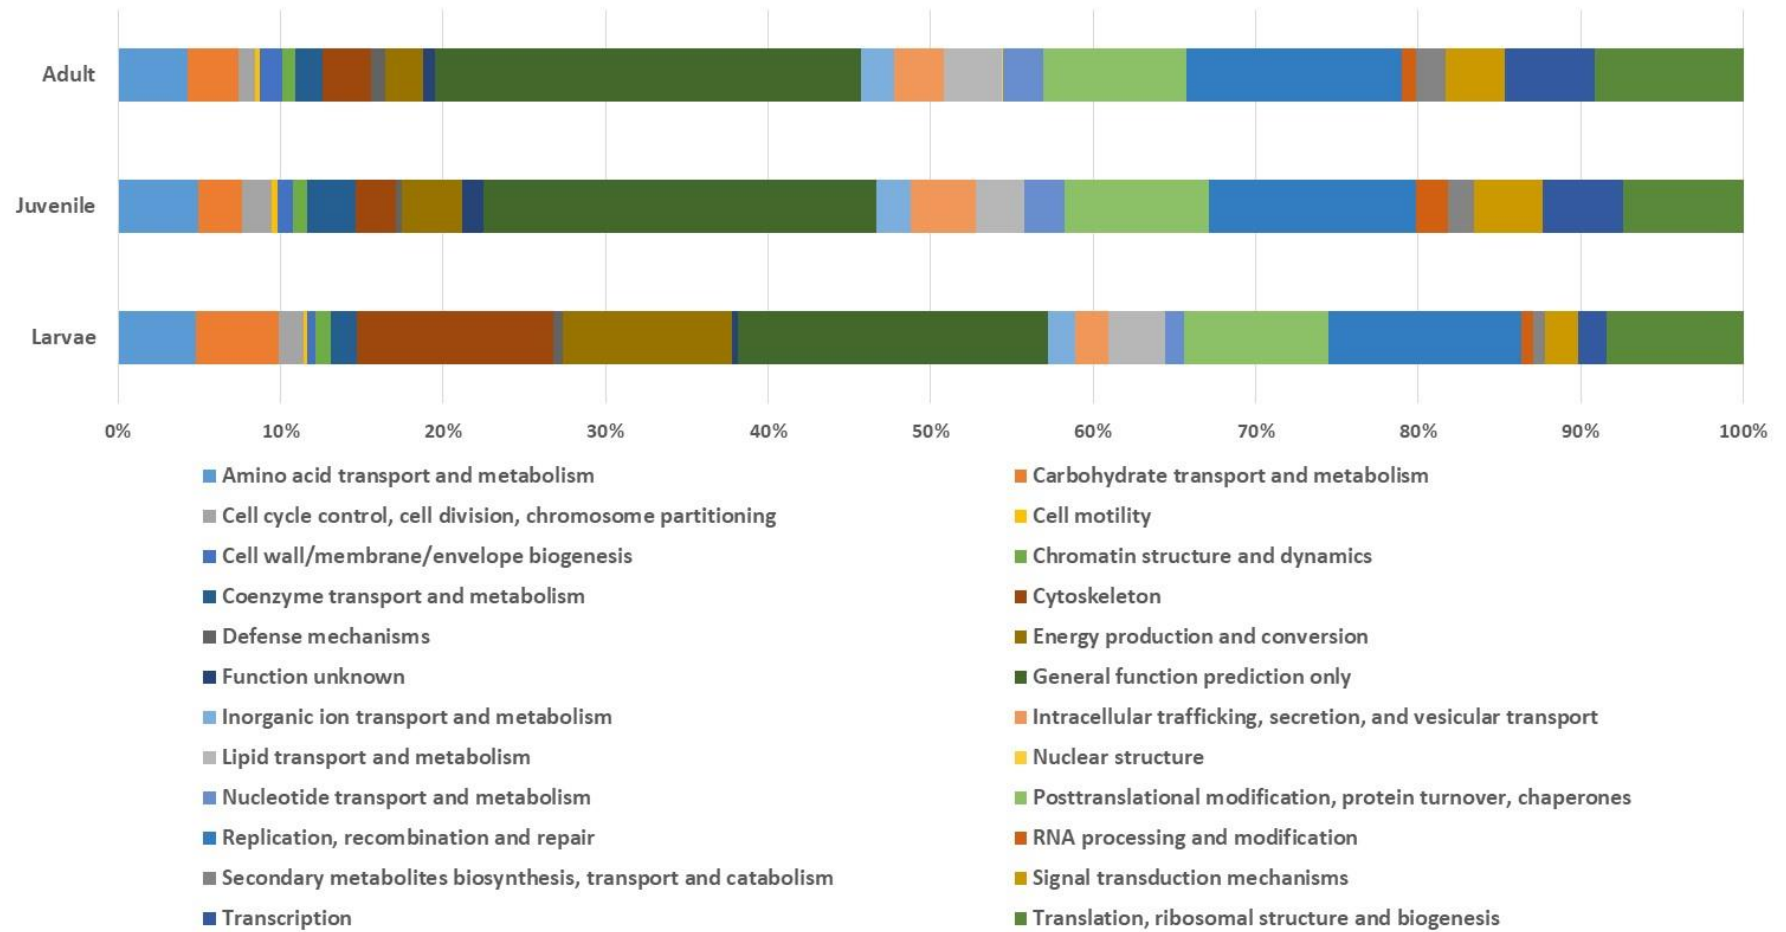

**Figure S2.** Functional classification based on level 2 clustered of orthologous groups in the eukaryotic transcripts during the development of *L. vannamei*.

**Supplementary Figure S3**

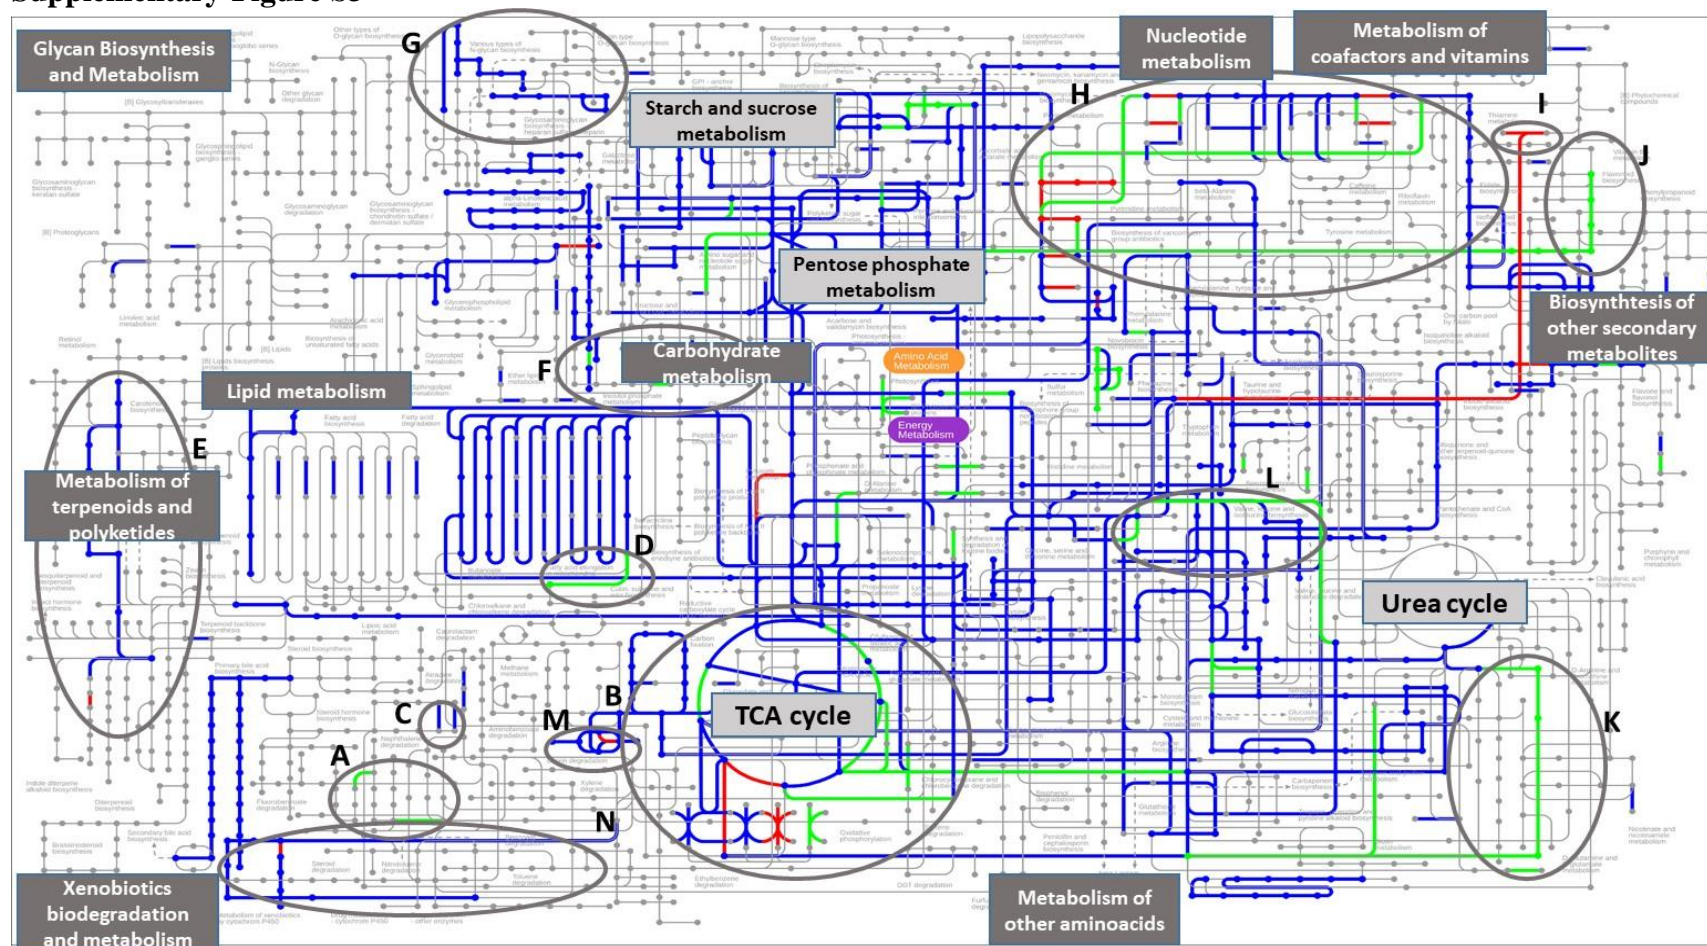

**Figure S3.** Global metabolic pathway analysis in larval stages of *L. vannamei*. Blue lines represent the host enzymatic modules, Red lines represents the microbiome enzymatic modules, Green lines represents shared enzymatic modules. (A) Xenobiotic degradation, (B) Energy metabolism (TCA, Oxidative phosphorylation), (C) Steroid biosynthesis, (D) Fatty Acid elongation, (E) Terpenoids and Polyketide metabolism, (F) Streptomycin biosynthesis, (G) Glycan biosynthesis (N-glycan, glycosaminoglycan), (H) Nucleotide metabolism, (I) Thiamine metabolism, (J) Vitamin B6 biosynthesis, (K) Aminoacid metabolism (Arg, Prol), (L) Glyoxylate and dicarboxylate metabolism (M) Carbon fixation, (N) Xenobiotic degradation (Toluene, Benzoate).



## Supplementary Figure S4

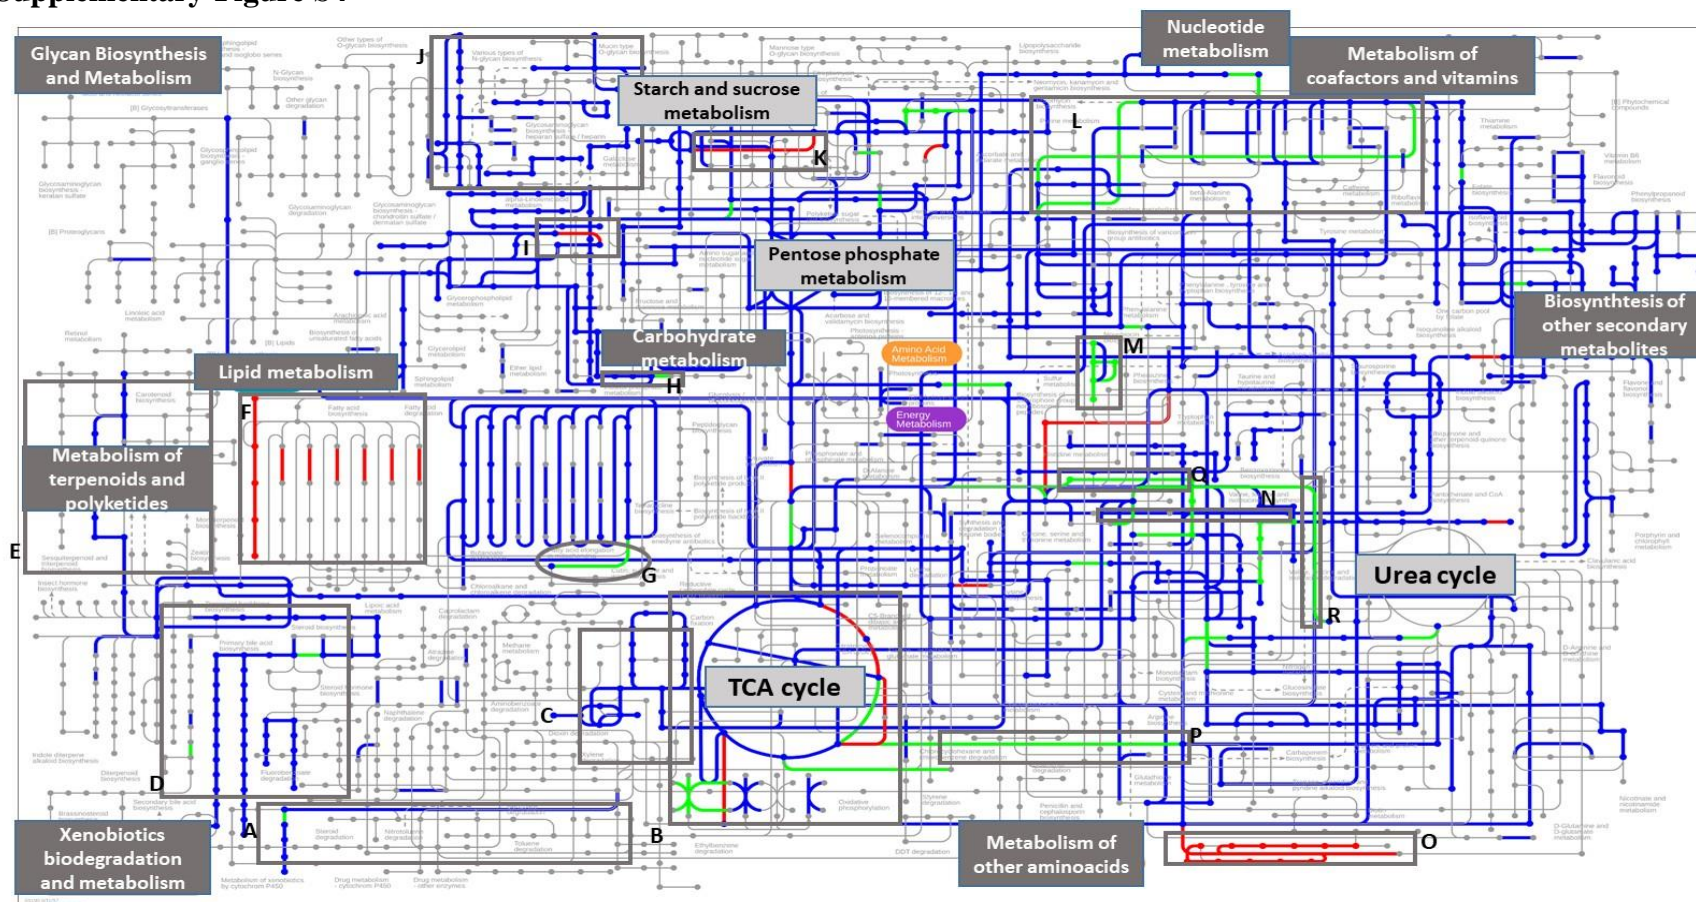

**Figure S4.** Global metabolic pathway analysis in juvenile stages of *L. vannamei*. Blue lines represents eukaryotic enzymatic modules, Red lines represents prokaryotic enzymatic modules, Green lines represents shared enzymatic modules. (A) Xenobiotic degradation (Toluene, Benzoate, Aminobenzoate), (B) Energy metabolism (TCA, Oxidative phosphorylation), (C) Carbon fixation in photosynthetic organisms, (D) Bile acids and steroid hormone biosynthesis, (E) Carotenoid biosynthesis, (F) Fatty acid biosynthesis, (G) Fatty acid elongation, (H) Streptomycin biosynthesis, (I) Glycerolipid metabolism, (J) Glycan biosynthesis (N-glycan, O-glycan, glycosaminoglycan), (K) Galactose metabolism, (L) Nucleotide metabolism, (M) Sulfur metabolism, (N) Porphyrin and Chlorophyll metabolism, (O) Biotin metabolism, (P) Nitrogen metabolism, (Q) Val, Leu and Ile biosynthesis, (R) Glyoxylate and dicarboxylate metabolism.

## Supplementary Figure S5

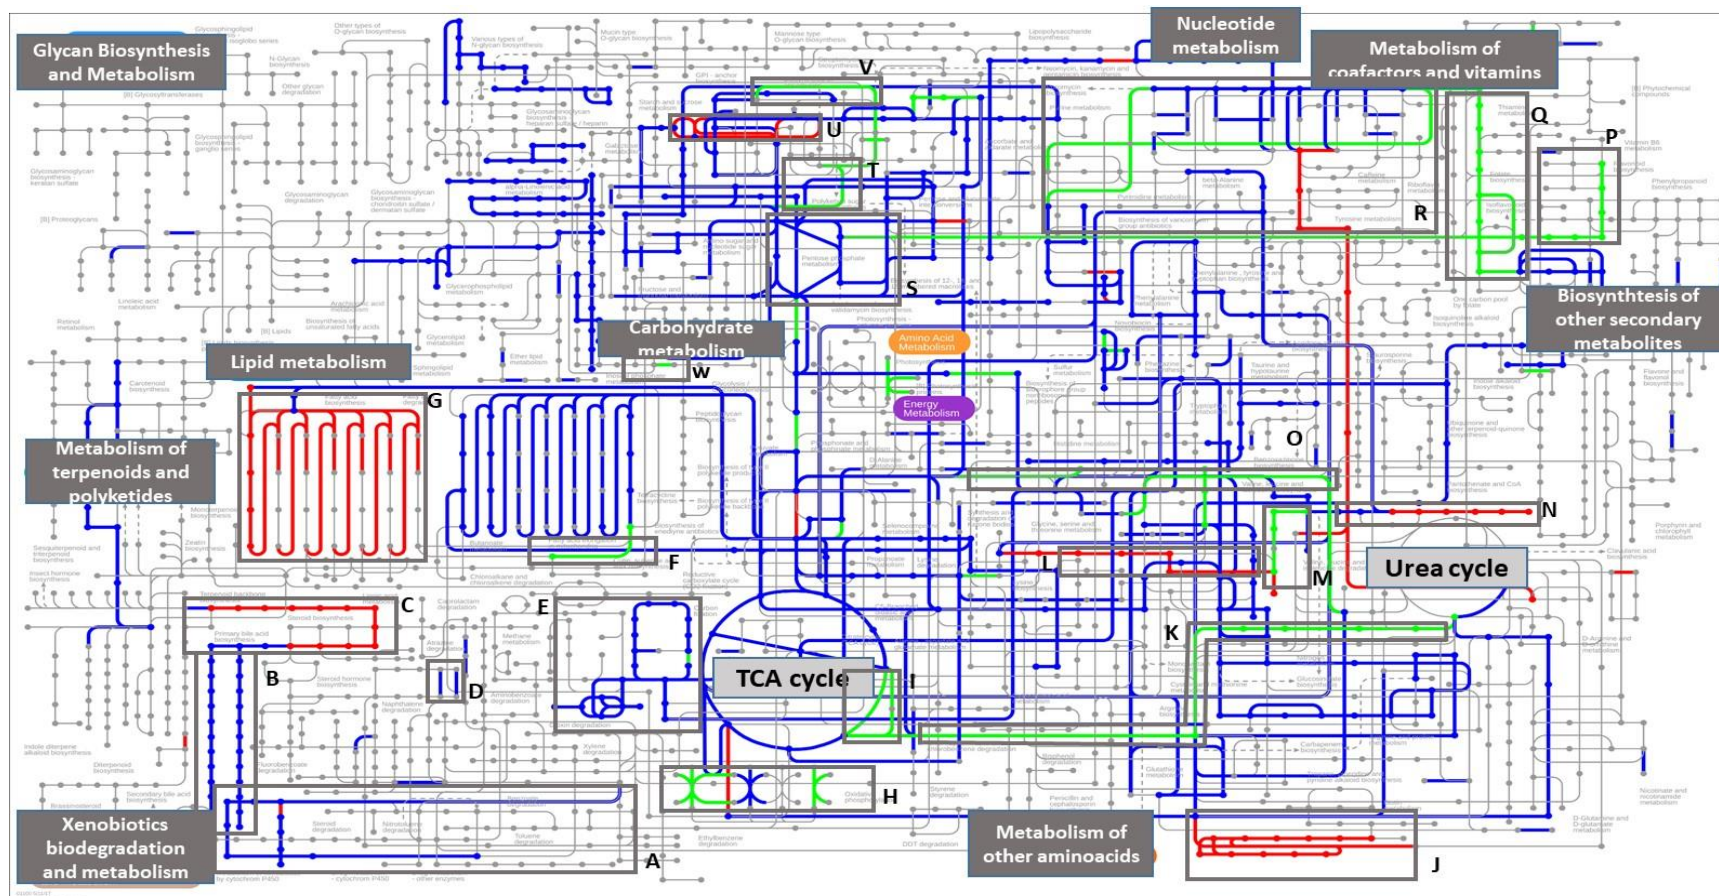

**Figure S5.** Global metabolic pathway analysis in adult stages of *L. vannamei*. Blue lines represents eukaryotic enzymatic modules, Red lines represents prokaryotic enzymatic modules, Green lines represents shared enzymatic modules. (A) Xenobiotic degradation, (B) Primary bile acid production, (C) Steroid biosynthesis, (D) Steroid hormone biosynthesis, (E) Photosynthetic carbon fixation, (F) Fatty acid elongation, (G) Fatty acid biosynthesis, (H) Oxidative phosphorylation, (I) Carbon fixation in prokaryotes, (J) Biotin, Arginine and Proline Metabolism, (K) Nitrogen metabolism, (L) Branched Aminoacid degradation, (M) Branched aminoacid biosynthesis, (N) Panthothenate biosynthesis, (O) Glyoxylate and dicarboxylate metabolism, (P) Vitamin B6 biosynthesis, (Q) Folate biosynthesis, (R) Nucleotide metabolism, (S) Ansamycin biosynthesis, (T) Galactose metabolism, (U) Aminosugar metabolism, (V) Starch and sucrose metabolism, (W) Streptomycin biosynthesis.

**Supplementary Table S1.**

**Table S1.** Metabolic pathway analysis of the microbiome of *L. vannamei* in different stages of development using the KEGG orthology classification.

| KO                              | Bacterial Metabolic Pathways             | % Contigs |          |       |
|---------------------------------|------------------------------------------|-----------|----------|-------|
|                                 |                                          | Larvae    | Juvenile | Adult |
| <b>Aminoacid metabolism</b>     | Ala, Asp and Glu metabolism              | 3.5       | 5.4      | 1.2   |
|                                 | Gly, Ser and Thr metabolism              | 1.2       | 13       | 3.7   |
|                                 | Cys and Met metabolism                   | 1.7       | 5.4      | NR    |
|                                 | Val, Leu and Ile degradation             | 1.7       | 9.1      | 1.2   |
|                                 | Arg and Pro metabolism                   | NR        | 3.6      | 2.5   |
|                                 | Trp metabolism                           | 0.6       | 3.6      | NR    |
| <b>Carbohydrate metabolism</b>  | Pyruvate metabolism                      | 1.2       | 1.8      | 3.7   |
|                                 | Glycolysis / Gluconeogenesis             | NR        | 3.6      | 1.2   |
|                                 | Pentose phosphate pathway                | 2.3       | 1.8      | 1.2   |
|                                 | Pentose and glucuronate interconversions | 1.2       | 1.8      | 3.7   |
| <b>Lipid metabolism</b>         | Fatty acid biosynthesis                  | NR        | 1.8      | 2.5   |
|                                 | Steroid biosynthesis                     | NR        | 1.8      | 1.2   |
|                                 | Glycerolipid metabolism                  | NR        | 1.8      | NR    |
|                                 | Fatty acid biosynthesis                  | 8.7       | 0.5      | 5.5   |
| <b>Energy metabolism</b>        | Oxidative phosphorylation                | 1.7       | NR       | 3.7   |
| <b>Nucleotide metabolism</b>    | Purine metabolism                        | 2.3       | 1.8      | 2.5   |
| <b>Signal transduction</b>      | Two-component system                     | 2.3       | 1.8      | 1.2   |
| <b>Transcription</b>            | RNA polymerase                           | 42        | 13       | 30    |
| <b>Translation</b>              | Ribosome                                 | 2.3       | 1.8      | 1.2   |
| <b>Transport and Catabolism</b> | Peroxisome                               | 0.5       | NR       | 5.0   |
| <b>Cancers</b>                  | Pathways in cancer                       | NR        | 1.8      | 2.5   |

NR: Non represented pathways.



**Supplementary Table S2.**

**Table S2.** Metabolic pathway analysis of *L. vannamei* in different stages of development using the KEGG orthology classification.

| KO                                        | Eukaryotic Metabolic Pathways               | % Contigs |          |       |
|-------------------------------------------|---------------------------------------------|-----------|----------|-------|
|                                           |                                             | Larvae    | Juvenile | Adult |
| <b>Aminoacid metabolism</b>               | Val, Leu and Ile degradation                | 2.5       | 1.5      | 1.1   |
|                                           | Gly, Ser and Thr metabolism                 | 1.9       | 1.0      | 1.3   |
| <b>Carbohydrate metabolism</b>            | Citrate cycle (TCA cycle)                   | 2.4       | 0.3      | 0.3   |
|                                           | Pentose and glucuronate interconversions    | 0.8       | 1.0      | 0.9   |
| <b>Cell communication</b>                 | Tight junction                              | 5.0       | 1.5      | 1.8   |
|                                           | Focal adhesión                              | 4.6       | 2.9      | 4.0   |
| <b>Folding, sorting and degradation</b>   | Protein processing in endoplasmic reticulum | 3.4       | 3.6      | 2.2   |
|                                           | Ubiquitin mediated proteolysis              | 1.5       | 4.6      | 3.7   |
| <b>Glycan biosynthesis and metabolism</b> | Other types of O-glycan biosynthesis        | 0.2       | 0.4      | 0.1   |
|                                           | N-Glycan biosynthesis                       | NR        | 1.0      | 1.0   |
| <b>Lipid metabolism</b>                   | Fatty acid metabolism                       | 0.7       | 0.2      | 0.1   |
|                                           | Glycerolipid metabolism                     | 0.1       | 1.0      | 1.0   |
| <b>Signal transduction</b>                | Calcium signaling pathway                   | 2.1       | 0.7      | 0.6   |
|                                           | MAPK signaling pathway                      | 1.3       | 2.7      | 1.7   |
| <b>Translation</b>                        | Ribosome                                    | 6.0       | 1.5      | 3.0   |
|                                           | RNA transport                               | 2.2       | 2.8      | 2.3   |
| <b>Infectious diseases</b>                | Vibrio cholerae infection                   | 0.5       | NR       | 0.1   |
|                                           | Malaria                                     | 0.1       | 0.5      | 0.3   |
| <b>Cancers</b>                            | Chemical carcinogénesis                     | 0.6       | 0.3      | 0.7   |
| <b>Cell growth and death</b>              | Cell cycle                                  | 1.8       | 3.6      | 2.4   |
| <b>Cell motility</b>                      | Regulation of actin cytoskeleton            | 1.0       | 1.0      | 1.2   |
| <b>Digestive system</b>                   | Protein digestion and absorption            | 0.1       | 0.2      | 0.5   |
| <b>Energy metabolism</b>                  | Methane metabolism                          | 0.7       | 0.2      | 0.1   |
| <b>Immune system</b>                      | RIG-I-like receptor signaling pathway       | NR        | 0.1      | 0.1   |
| <b>Membrane transport</b>                 | ABC transporters                            | 0.2       | 0.4      | 1.1   |

---

|                                                        |                           |     |     |     |
|--------------------------------------------------------|---------------------------|-----|-----|-----|
| <b>Nucleotide metabolism</b>                           | Purine metabolism         | 0.5 | 0.9 | 1.4 |
| <b>Transcription</b>                                   | Spliceosome               | 3.0 | 5.7 | 5.7 |
| <b>Transport and catabolism</b>                        | Lysosome                  | 3.7 | 3.2 | 3.5 |
| <b>Biosynthesis of other<br/>secondary metabolites</b> | Streptomycin biosynthesis | 0.3 | 0.2 | 0.2 |

---

NR: Non represented pathways.
